# Vertebrate Paralogous MEF2 Genes: Origin, Conservation, and Evolution

Wenwu Wu<sup>1,2</sup>, Stefan de Folter<sup>3</sup>, Xia Shen<sup>4</sup>, Wenqian Zhang<sup>1</sup>, Shiheng Tao<sup>1,2\*</sup>

**1** College of Life Science, Northwest A&F University, Yangling, Shaanxi, China, **2** Bioinformatics Center, Northwest A&F University, Yangling, Shaanxi, China, **3** Laboratorio Nacional de Genómica para la Biodiversidad (Langebio), Centro de Investigación y de Estudios Avanzados del Instituto Politécnico Nacional (CINVESTAV-IPN), Campus Guanajuato, Guanajuato, Mexico, **4** College of Drug Research, Shaanxi University of Chinese Medicine, Xi'an, Shaanxi, China

## Abstract

**Background:** The myocyte enhancer factor 2 (MEF2) gene family is broadly expressed during the development and maintenance of muscle cells. Although a great deal has been elucidated concerning MEF2 transcription factors' regulation of specific gene expression in diverse programs and adaptive responses, little is known about the origin and evolution of the four members of the MEF2 gene family in vertebrates.

**Methodology/Principal Findings:** By phylogenetic analyses, we investigated the origin, conservation, and evolution of the four MEF2 genes. First, among the four MEF2 paralogous branches, MEF2B is clearly distant from the other three branches in vertebrates, mainly because it lacks the HJURP\_C (Holliday junction recognition protein C-terminal) region. Second, three duplication events might have occurred to produce the four MEF2 paralogous genes and the latest duplication event occurred near the origin of vertebrates producing MEF2A and MEF2C. Third, the ratio ( $K_a/K_s$ ) of non-synonymous to synonymous nucleotide substitution rates showed that MEF2B evolves faster than the other three MEF2 proteins despite purifying selection on all of the four MEF2 branches. Moreover, a pair model of M0 versus M3 showed that variable selection exists among MEF2 proteins, and branch-site analysis presented that sites 53 and 64 along the MEF2B branch are under positive selection. Finally, and interestingly, substitution rates showed that type II MADS genes (i.e., MEF2-like genes) evolve as slowly as type I MADS genes (i.e., SRF-like genes) in animals, which is inconsistent with the fact that type II MADS genes evolve much slower than type I MADS genes in plants.

**Conclusion:** Our findings shed light on the relationship of MEF2A, B, C, and D with functional conservation and evolution in vertebrates. This study provides a rationale for future experimental design to investigate distinct but overlapping regulatory roles of the four MEF2 genes in various tissues.

**Citation:** Wu W, Folter Sd, Shen X, Zhang W, Tao S (2011) Vertebrate Paralogous MEF2 Genes: Origin, Conservation, and Evolution. PLoS ONE 6(3): e17334. doi:10.1371/journal.pone.0017334

**Editor:** Jürgen Brosius, University of Münster, Germany

**Received:** August 8, 2010; **Accepted:** January 31, 2011; **Published:** March 4, 2011

**Copyright:** © 2011 Wu et al. This is an open-access article distributed under the terms of the Creative Commons Attribution License, which permits unrestricted use, distribution, and reproduction in any medium, provided the original author and source are credited.

**Funding:** The authors gratefully acknowledge The PhD Programs Foundation of Ministry of Education of China (20100204110026) in SHT Lab, The Scholarship Award for Excellent Doctoral Student granted by Ministry of Education to WWW, and the Mexican Science Council (CONACYT 82826) in SDF Lab. The funders had no role in study design, data collection and analysis, decision to publish, or preparation of the manuscript.

**Competing Interests:** The authors have declared that no competing interests exist.

\* E-mail: shihengt@nwsuaf.edu.cn

## Introduction

The myocyte enhancer factor 2 (MEF2) gene family, which belong to the evolutionarily ancient MADS (MCM1, AGAMOUS, DEFICIENS, and SRF)-box superfamily [1–4], has four members referred to as MEF2A, B, C, and D located on different chromosomes in vertebrate genomes [5,6]. Of the four MEF2 members, all can be tissue-specific alternatively spliced, producing multiple isoforms which have significant functional differences [1–4]. They recognize and bind to the consensus DNA sequence CTA(A/T)<sub>4</sub>TAG/A as homo- or heterodimers via a 56-amino acid domain (i.e. MADS-box) [7,8]. Adjacent to the MADS-box is a 29-amino acid extension, referred to as the MEF2-specific (MEF2s) domain, which contributes to high-affinity DNA binding and dimerization with other homologous MEF2 proteins and facilitates interactions with other cofactors [9,10]. The C-terminal of MEF2 proteins, which is subject to complex patterns of alternative splicing, contains the transcriptional activation domain to promote signal transduction and/or regulate target gene transcription [9,11–13].

The four MEF2 proteins display distinct but overlapping expression patterns and regulate the intricate temporal and spatial pattern of gene expression in body development and maintenance [14–16]. The well-established roles of MEF2 in muscle development are to control myogenesis and morphogenesis by cooperating with myogenic bHLH factors (e.g. MyoD, myogenin) [2,17,18], homeobox proteins (e.g. tinman, Gax) [19,20], and/or GATA factors (e.g. GATA4) [21,22]. Other important functions crucially dependent on MEF2 factors have also been elucidated since their discovery. Among these are the regulation of nervous system during both development and injury repair [23,24], multiple roles in the immune system [25,26], adipocytes [27], endothelium [28,29], and chondrocytes and bones [30–32]. In the case of MADS proteins in plants, a lot of studies have been focused not only on the functional level, such as revealing ABCDE model for flower organ identity (for review, see [33–35]) in Arabidopsis, but also on MADS phylogeny [36–39] as well as on natural selection with a particular focus on adaptive evolution [40–42].



**Table 1.** Rates of synonymous ( $K_s$ ) and nonsynonymous ( $K_a$ ) nucleotide substitutions ( $\pm$  standard errors) and their ratios ( $\omega$ ) for MEF2 protein-coding regions.

| Gene  | Codons | $\kappa$ | $\omega$ | $K_a$               | $K_s$               |
|-------|--------|----------|----------|---------------------|---------------------|
| MEF2A | 489    | 2.01     | 0.052    | 0.0184 $\pm$ 0.0042 | 0.3533 $\pm$ 0.0383 |
| MEF2B | 347    | 3.35     | 0.193    | 0.1578 $\pm$ 0.0157 | 0.8193 $\pm$ 0.1044 |
| MEF2C | 465    | 2.31     | 0.024    | 0.0059 $\pm$ 0.0024 | 0.2435 $\pm$ 0.0312 |
| MEF2D | 606    | 2.18     | 0.038    | 0.0146 $\pm$ 0.0036 | 0.3832 $\pm$ 0.0444 |

Note: All rates are based on comparisons between human and mouse MEF2 coding regions.  $\kappa$  indicates the ratio of the transition to transversion rates. doi:10.1371/journal.pone.0017334.t001

nonsynonymous and synonymous substitution rates than the other three MEF2 proteins, and the other three proteins evolve at the same order of magnitude level, though MEF2A has a twice bigger  $\omega$  ratio compared to MEF2C.

One of the unresolved issues about the MEF2 family is whether the increased  $\omega$  ratio of MEF2B reflects (i) simply a long-term accumulation under a relaxed selection pressure, or (ii) an abrupt increase in an episodic period for functional divergence following the duplication event. The other question is whether or not some sites in the MEF2 family or in some particular MEF2 branches are under positive selection. In the following, we will focus on variable natural selection among the four MEF2 branches, MEF2 sites, and the sites along particular MEF2 branches to test these scenarios.

#### Natural selection among the four MEF2A-D branches

We assumed variable  $\omega$  evolutionary ratios among MEF2 branches in MEF2 phylogeny, and then tested for a significant difference of the ratios based on Likelihood Ratio Test (LRT) (see Materials and methods) [51,52]. The null hypothesis (H0) is that the evolutionary ratios for the MEF2 family are all simply due to underlying uniform mutation rates (*i.e.*  $\omega$  is identical across all the branches of the MEF2 phylogeny). Under the H0 model (see Table 2), the estimate of  $\omega$  is 0.012, indicating that the evolution of all the MEF2 members was dominated by strong purifying selection which is consistent with previous results (see Table 1). Given that no significant difference of H1 versus H0 was detected, the increased  $\omega$  rate of MEF2B is likely from a long-term accumulation under a relaxed selection pressure on MEF2B. In addition, among the six alternatives to H0, H5 and H6 for MEF2A and MEF2C branches both with  $p$ -value $<$ 0.01 suggest

that selection pressure ( $\omega=0.001$ ) on MEF2A and MEF2C is significantly stronger than on the other two MEF2 branches consistent with previous results (see Table 1).

#### Natural selection among MEF2A-D sites

Strong purifying selection dominates the four MEF2 branches regardless of relative relaxed purifying selection on the MEF2B branch, however, whether some sites in MEF2 sequences under adaptive evolution or variable selection are still unknown. To test these, we conducted the following pairs of models from PAML4 [51,53]: M0 versus M3, M1a versus M2a, and M7 versus M8, and the results are presented in Table 3. For both pair models of M1a versus M2a and M7 versus M8, none of the  $p$ -values by LRT are less than 0.01, suggesting that no sites in MEF2 proteins are under positive selection. However, for the pair model of M0 versus M3, the LRT ( $2\Delta\ell=29.568, df=4, p\text{-value}<0.01$ ) suggests that there are indeed certain sites under highly variable selection pressures across MEF2 proteins. In summary, the analyses show that although none of sites in MEF2 proteins are under positive selection, variable selection pressures exist among MEF2 sites.

#### Natural selection among sites along particular MEF2A, B, C, and D branches

Given that positive selection often operates only on a few amino acid sites along particular branches [53], we employed branch-site specific Model A (see Materials and methods) to detect whether some sites along particular MEF2 branches are under positive selection, and the results are presented in Table 4. Along MEF2A and MEF2C branches, there are no sites with  $\omega$  ratio greater than 1 demonstrating that none of the sites in the branches underwent adaptive evolution. However, along MEF2B and MEF2D branches, both of the LRTs are significant less than 0.05, demonstrating that some sites along the MEF2B and MEF2D branches underwent adaptive evolution. The sites are 53 and 64 under positive selection with the posterior probability  $>95\%$  along the MEF2B branch as well as 50 along the MEF2D branch (see Discussion).

#### Evolution of type I and type II MADS factors

There are two types of MADS factors in plants and animals, called type I (SRF-like) and type II (MEF2-like) MADS factors [54]. To our knowledge, type I MADS factors evolve faster than type II MADS factors in plants [55,56]. However, little is known about the evolutionary rate of the two types in animals. Substitution rates of SRF and MEF2A-D genes in the human

**Table 2.** Parameter estimates under branch-specific models among the four MEF2 branches for MADS and MEF2s coding regions.

| Branch-specific Models                                                          | $\omega_B$ | $\omega_{ADC}$ | $\omega_D$ | $\omega_{AC}$ | $\omega_C$ | $\omega_A$ | $2\Delta$ | $p$ -value |
|---------------------------------------------------------------------------------|------------|----------------|------------|---------------|------------|------------|-----------|------------|
| H0: $\omega_B = \omega_{ADC} = \omega_D = \omega_{AC} = \omega_C = \omega_A$    | 0.012      | 0.012          | 0.012      | 0.012         | 0.012      | 0.012      | -1693.33  |            |
| H1: $\omega_B \neq \omega_{ADC} = \omega_D = \omega_{AC} = \omega_C = \omega_A$ | 0.073      | 0.013          | 0.013      | 0.013         | 0.013      | 0.013      | -1692.44  | 1.78       |
| H2: $\omega_B = \omega_D = \omega_{AC} = \omega_C = \omega_A \neq \omega_{ADC}$ | 0.013      | 0.073          | 0.013      | 0.013         | 0.013      | 0.013      | -1692.44  | 1.78       |
| H3: $\omega_B = \omega_{ADC} = \omega_{AC} = \omega_C = \omega_A \neq \omega_D$ | 0.012      | 0.012          | 0.051      | 0.012         | 0.012      | 0.012      | -1692.53  | 1.61       |
| H4: $\omega_B = \omega_{ADC} = \omega_D = \omega_C = \omega_A \neq \omega_{AC}$ | 0.013      | 0.013          | 0.013      | 0.012         | 0.013      | 0.013      | -1693.43  | 0.20       |
| H5: $\omega_B = \omega_{ADC} = \omega_D = \omega_{AC} = \omega_A \neq \omega_C$ | 0.012      | 0.012          | 0.012      | 0.012         | 0.001      | 0.012      | -1689.91  | 6.84       |
| H6: $\omega_B = \omega_{ADC} = \omega_D = \omega_{AC} = \omega_C \neq \omega_A$ | 0.018      | 0.018          | 0.018      | 0.018         | 0.018      | 0.001      | -1686.80  | 13.05      |

Note: The topology and branch-specific  $\omega$  ratios are presented in Figure S2. The degree of freedom (df) is 1 for the comparisons of null model H0 versus the alternative model from H1 to H6.

\*\*Significance with  $P<0.01$ .

doi:10.1371/journal.pone.0017334.t002

**Table 3.** Parameter estimates under site pair models for the MADS and MEF2s coding regions.

| Model                           | $\omega$ | Parameter estimates                                                                                | PSS         | $2\Delta$ |          |
|---------------------------------|----------|----------------------------------------------------------------------------------------------------|-------------|-----------|----------|
| Model 0(one-ratio)              | 0.012    | $\omega = 0.077$                                                                                   | none        | -1693.329 | 29.568** |
| Model 3(discrete)               | 0.024    | p: 0.467 0.425 0.109<br>$\omega$ : 0.001 0.015 0.156                                               | none        | -1678.545 |          |
| Model 1a<br>(NearlyNeutral)     | 0.019    | p: 0.989 0.011<br>$\omega$ : 0.008 1.000                                                           | not allowed | -1689.428 | 0        |
| Model 2a<br>(PositiveSelection) | 0.019    | p: 0.989 0.011 0.000<br>$\omega$ : 0.008 1.000 7.394<br>(note that p[2] is zero)                   | none        | -1689.428 |          |
| Model 7(beta)                   | 0.015    | p = 0.160 q = 9.200                                                                                | not allowed | -1674.351 | 0        |
| Model 8(beta& $\omega$ )        | 0.015    | p0 = 0.999 p = 0.160 q = 9.200<br>(p1 = 0.00001) $\omega$ = 1.899<br>(note that p1 is nearly zero) | none        | -1674.352 |          |

Note: The  $\omega$  represents for  $K_a/K_s$ , that is the average of selection across all sites in the MEF2 coding regions. PSS represents the number of sites under positive selection. \*\*Significance with  $P < 0.01$ .

doi:10.1371/journal.pone.0017334.t003

and mouse genomes are presented in Figure 2. From the figure, mSRF (referred to as SRF in mice) evolves faster than its corresponding orthologous hSRF (referred to as SRF in humans). Likewise, the evolutionary rate of the MEF2 family also reveals the same pattern that MADS factors evolve faster in mice than in humans. When comparing paralogous genes, the substitution rate of MEF2B is much higher than that of SRF, MEF2A, MEF2C, and MEF2D, demonstrating that MEF2B evolves faster than SRF as well as MEF2A, MEF2C, and MEF2D. In support of this result, the analysis of indels revealed that MEF2B bears 7 short fragment deletions and 1 fragment insertion, which is more than the other MADS-box factors bearing in the mouse genome. Furthermore, there are also slight differences in evolutionary rate among MEF2A, MEF2C, MEF2D, and SRF between mice and humans.

## Discussion

The four members of the MEF2 gene family are broadly expressed in different but overlapping patterns during embryogenesis and postnatal development as well as throughout adulthood in vertebrates [2,15,16]. Here, we analyzed the evolutionary relationship of the four MEF2 proteins. Phylogenetic analysis shows that MEF2B is the most distant from the other three MEF2 proteins in vertebrates, and MEF2A and MEF2C originated from the latest duplication event near the origin of vertebrates. Lineage-specific analysis of the MEF2 gene family shows that a long-term accumulation of substitutions after the duplication led to the MEF2B branch evolving faster than the other MEF2 branches. In addition, site-specific analysis of the MEF2 gene family shows that although all the sites in MEF2 proteins are clearly constrained by purifying selection, variable purifying selection appears in the MADS and MEF2s regions of MEF2 proteins. In contrast to strong purifying selection, branch-site analysis shows that sites 53 and 64 along the MEF2B branch and 50 along the MEF2D branch are under positive selection. Furthermore, analysis of substitution rates for SRF and MEF2A-D shows that SRF evolves as slowly as MEF2 proteins except for MEF2B.

### Duplication of MEF2 genes

MEF2B is the most distant among the four MEF2 members in vertebrates, which is mainly because of lacking the HJURP\_C

region (see Figure 3), but also other sequential characters. In support of this, the MEF2A-D phylogenetic tree (see Figure S2) constructed by the alignment of only the MADS and MEF2s regions also proves that MEF2B is the most distant. In addition, an invertebrate animal called *Nematostella vectensis* has two MEF2-type genes (see Figure 3) [57]: one has no HJURP\_C region similar to MEF2B in vertebrates; and the other has the HJURP\_C region similar to MEF2A, C, and D. To our knowledge, the origin of the HJURP\_C region is far much later than MADS/MEF2s domains because that the HJURP was just found in higher eukaryotes [58]. Given that original MEF2 proteins have no such HJURP\_C region, we presume that the origin of MEF2B is more ancient than the other three MEF2 proteins which include the HJURP\_C region, and the three MEF2 proteins should share a common ancestor also including the HJURP\_C region. According to the presence of two MEF2-type genes in the invertebrate species *Nematostella vectensis*: one has the HJURP\_C region and the other does not, we further presume that the first duplication event occurred before the origin of vertebrates producing two copies of MEF2 genes, and in the following evolutionary process, one finally became extant MEF2B, the other was inserted by the HJURP\_C region which lies at C-terminal to the MADS/MEF2s regions and this MEF2 gene might be the most recent common ancestor of MEF2D, A, and C. Thereafter, such MEF2 gene had two duplication events to produce MEF2D, A, and C near the origin of vertebrates.

In relation to gene duplication patterns, MEF2A-D genes seem to originate from interchromosomal duplications considering that the four MEF2 genes are distributed on different chromosomes [5,6].

### Functional constraints on MEF2A-D

The pairwise approach proposed by Yang et al. [59] is an efficient iterative means for computing synonymous and non-synonymous substitution rates. By this approach, we found that, in addition to MEF2A-D under purifying selection, MEF2B evolves faster than the other three MEF2 proteins. A reasonable explanation is that the functional constraint on MEF2B is lower than on the other three MEF2 genes. This could be why few mutant MEF2B phenotypes have ever been reported. In contrast, many mutant phenotypes have been known for MEF2A, C, and D

**Table 4.** Parameter estimates under branch-site models along particular MEF2 branch.

| Branch-site models         |                  | Parameter estimates                                                      | PSS                    | 2Δ        |        |
|----------------------------|------------------|--------------------------------------------------------------------------|------------------------|-----------|--------|
| Foreground<br>MEF2A Branch | Model A H0       | $\omega_0 = 0.008$ $P_0 = 0.989$ $\omega_1 = 1.000$ $P_1 = 0.011$        | Not allowed            | -1689.428 | 0      |
|                            | $(\omega_2 = 1)$ | $\omega_{2a}$ fore = 1.000 $\omega_{2a}$ back = 0.008 $P_{2a} = 0.000$   |                        |           |        |
|                            |                  | $\omega_{2b}$ fore = 1.000 $\omega_{2b}$ back = 1.000 $P_{2b} = 0.000$   |                        |           |        |
|                            | Model A H1       | $\omega_0 = 0.008$ $P_0 = 0.989$ $\omega_1 = 1.000$ $P_1 = 0.011$        | None                   | -1689.428 |        |
|                            | $(\omega_2 = 1)$ | $\omega_{2a}$ fore = 1.000 $\omega_{2a}$ back = 0.008 $P_{2a} = 0.000$   |                        |           |        |
|                            |                  | $\omega_{2b}$ fore = 1.000 $\omega_{2b}$ back = 1.000 $P_{2b} = 0.000$   |                        |           |        |
| Foreground<br>MEF2C Branch | Model A H0       | $\omega_0 = 0.008$ $P_0 = 0.989$ $\omega_1 = 1.000$ $P_1 = 0.011$        | Not allowed            | -1689.428 | 0      |
|                            | $(\omega_2 = 1)$ | $\omega_{2a}$ fore = 1.000 $\omega_{2a}$ back = 0.008 $P_{2a} = 0.000$   |                        |           |        |
|                            |                  | $\omega_{2b}$ fore = 1.000 $\omega_{2b}$ back = 1.000 $P_{2b} = 0.000$   |                        |           |        |
|                            | Model A H1       | $\omega_0 = 0.008$ $P_0 = 0.989$ $\omega_1 = 1.000$ $P_1 = 0.011$        | None                   | -1689.428 |        |
|                            | $(\omega_2 = 1)$ | $\omega_{2a}$ fore = 1.000 $\omega_{2a}$ back = 0.008 $P_{2a} = 0.000$   |                        |           |        |
|                            |                  | $\omega_{2b}$ fore = 1.000 $\omega_{2b}$ back = 1.000 $P_{2b} = 0.000$   |                        |           |        |
| Foreground<br>MEF2B Branch | Model A H0       | $\omega_0 = 0.011$ $P_0 = 0.832$ $\omega_1 = 1.000$ $P_1 = 0.011$        | Not allowed            | -1686.781 | 3.062* |
|                            | $(\omega_2 = 1)$ | $\omega_{2a}$ fore = 1.000 $\omega_{2a}$ back = 0.011 $P_{2a} = 0.155$   |                        |           |        |
|                            |                  | $\omega_{2b}$ fore = 1.000 $\omega_{2b}$ back = 1.000 $P_{2b} = 0.000$   |                        |           |        |
|                            | Model A H1       | $\omega_0 = 0.011$ $P_0 = 0.871$ $\omega_1 = 1.000$ $P_1 = 0.011$        | 9 (0.851) 12 (0.862)   | -1685.250 |        |
|                            | $(\omega_2 = 1)$ | $\omega_{2a}$ fore = 8.299 $\omega_{2a}$ back = 0.011 $P_{2a} = 0.155$   | 14(0.795) 51(0.760)    |           |        |
|                            |                  | $\omega_{2b}$ fore = 8.299 $\omega_{2b}$ back = 1.000 $P_{2b} = 0.002$   | 53(0.996**) 64(0.964*) |           |        |
|                            |                  | 73(0.647) 85(0.614)                                                      |                        |           |        |
|                            |                  | 90(0.694)                                                                |                        |           |        |
| Foreground<br>MEF2D Branch | Model A H0       | $\omega_0 = 0.007$ $P_0 = 0.920$ $\omega_1 = 1.000$ $P_1 = 0.011$        | Not allowed            | -1682.317 | 3.360* |
|                            | $(\omega_2 = 1)$ | $\omega_{2a}$ fore = 1.000 $\omega_{2a}$ back = 0.007 $P_{2a} = 0.068$   |                        |           |        |
|                            |                  | $\omega_{2b}$ fore = 1.000 $\omega_{2b}$ back = 1.000 $P_{2b} = 0.001$   |                        |           |        |
|                            | Model A H1       | $\omega_0 = 0.011$ $P_0 = 0.944$ $\omega_1 = 1.000$ $P_1 = 0.011$        | 9(0.909) 50(0.963*)    | -1680.637 |        |
|                            | $(\omega_2 = 1)$ | $\omega_{2a}$ fore = 999.000 $\omega_{2a}$ back = 0.011 $P_{2a} = 0.045$ |                        |           |        |
|                            |                  | $\omega_{2b}$ fore = 999.000 $\omega_{2b}$ back = 1.000 $P_{2b} = 0.001$ |                        |           |        |

Note: Model A H0 is specified using fixed  $\omega_2 = 1$ . The p-value of Model A H0 versus Model A H1 for the MEF2B and MEF2D branches is 0.040 and 0.033, respectively, which are considered to be statistically significant.  
doi:10.1371/journal.pone.0017334.t004

from mice [60]. For example, targeted inactivation of MEF2A, C, and D in mice results in cardiac lethality [61], embryonic lethality [62], and a failure of normal bone development [30], respectively. Poor mutant phenotypes for MEF2B gene could be because of its possible functional redundancy with other MEF2 genes and thus MEF2B probably functions as a potential candidate for the other MEF2 proteins. In support of this hypothesis, the alternative splicing of MEF2B transcripts is altered in MEF2C mutant embryos [63], and a significant upregulation of MEF2B expression was observed [62]. However, double or multiple knockouts of MEF2B and other MEF2 genes, such as inactivation of MEF2C and MEF2B in embryos, will be especially interesting and would provide more information on the roles of MEF2B.

Although all the MEF2 genes are subject to purifying selection, different sites of MEF2 genes including MADS and MEF2s regions are under variable purifying selection. Site model analysis shows that none common sites in the four MEF2 branches are under positive selection, whereas branch-site analysis shows that sites 53 and 64 along MEF2B branch and 50 along MEF2D branch are under positive selection. Of interest, at both sites 53 and 64, amino acid R is present in MEF2B branch in contrast to K

in the other MEF2 branches. Elegant studies from Alvarez-Buylla's group [41,42] presented that some positions in the K domain of MIKC proteins in plants, which has similar functions (e.g. dimerization) as MEF2s region in MEF2 proteins, are under positive selection involved in both dimerization and  $\alpha$ - $\beta$  folding; whereas functional differences between R and K on the two sites (i.e. 53 and 64) are little known. In the case of site 50 along the MEF2D branch, residue H is present in contrast to residue S in the homologous site along the other MEF2 branches. However, the  $\omega$  ratio for this site is 999 because of the rate of synonymous substitution  $K_s = 0$  and thus  $K_a/K_s$  is represented as 999.

#### Faster evolutionary rate of MADS factors in mice than in humans

MADS factors evolve faster in mice than in humans. One reasonable explanation is that mice with a shorter generation length than humans would undergo more germ-line cell divisions and thus accumulate a larger number of mutations in unit time, which would lead to a larger number of substitutions in mice than in humans [64,65]. However, a shorter generation length of about 80 times in mice than in humans [65] is largely inconsistent with

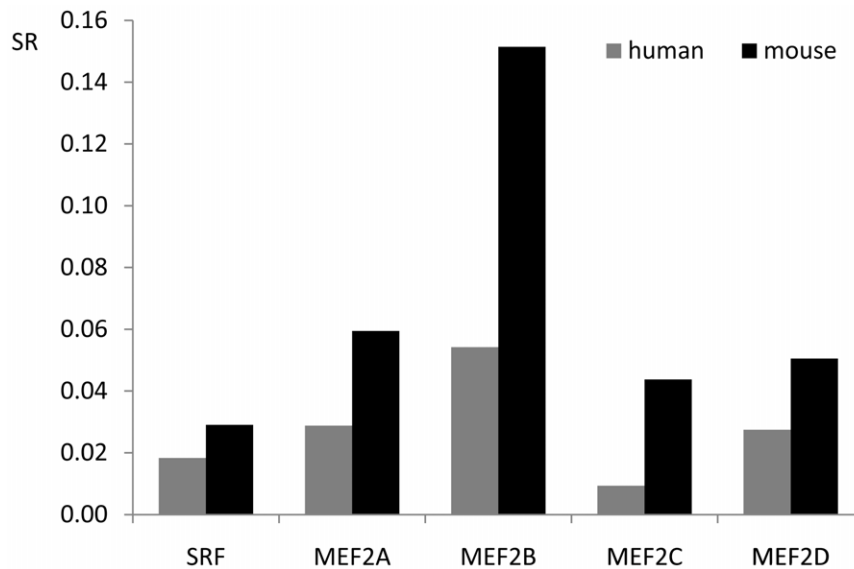

**Figure 2. Substitution rates of SRF and MEF2A-D coding regions in the human and mouse genomes.** SR on Y-axis represents for substitution rate, that is, mutation rate per site across the corresponding coding region. Dog and cow are used as outgroups to identify substitution sites.

doi:10.1371/journal.pone.0017334.g002

only 1–3 times the substitution rates of MADS factors in mice than in humans. Therefore, there should be other ways to affect the accumulation of substitutions, such as mutation repair efficiency [66], rate of cell division [67], and weight-specific metabolic rate [68]. Furthermore, essential functions of MADS factors whether in mice or humans, usually do not suffer deleterious mutations in MADS factors and thus natural selection would eliminate such mutations. Given these causes, MADS factors evolve just 1–3 times faster in mice than in humans. However, which one or more causes play pivotal roles in constraining the evolutionary rate will need to be evaluated with further research.

### Similar functional conservation between type I and type II MADS factors in animals

Based on evolutionary analysis of MADS-box genes in plants, two groups [55,56] concluded that type I MADS genes evolve much faster than type II MADS genes. Our findings in animals, however, indicate that type I MADS genes, evolve as slowly as type II MADS genes. Unlike, possibly, less functional importance or functional redundancy of type I MADS factors in plants [69], type I MADS factor usually represented as only one SRF-like MADS factor in animals is expressed ubiquitous and plays essential roles in cell differentiation and growth [70–72]. For

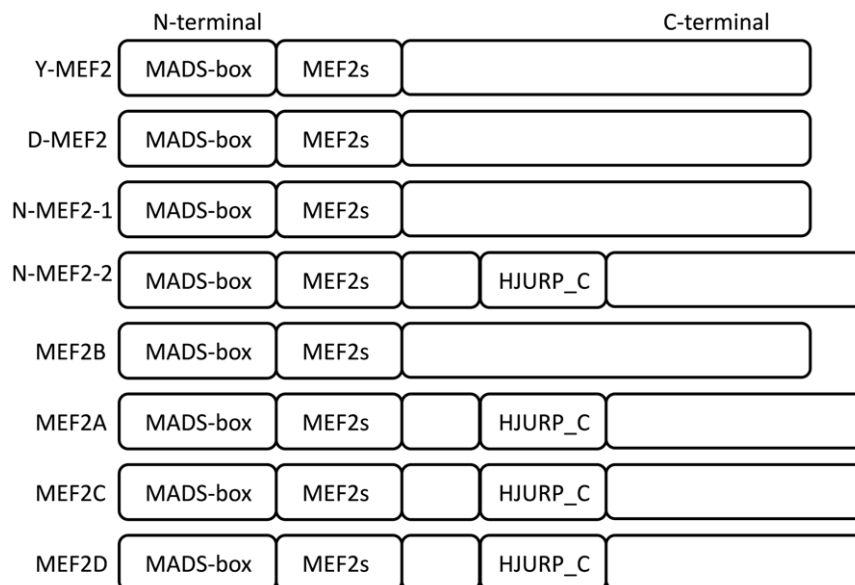

**Figure 3. Domain regions in MEF2 proteins.** N-terminal and C-terminal are marked on the left and right, respectively. Y-MEF2, D-MEF2, and N-MEF2-1 and N-MEF2-2 represent for MEF2 proteins of yeast, Drosophila, and Nematostella, respectively, in invertebrates. MEF2A-D represents for MEF2 proteins in vertebrates.

doi:10.1371/journal.pone.0017334.g003

example, SRF-null mice die before gastrulation and do not form mesoderm [73], demonstrating that SRF is an obligatory transcription factor and thus mutation of SRF would lead to injury, illness, and even death of the organism. In contrast to SRF, the four members of the MEF2 family are mainly involved in tissue-restricted gene expression of three muscle cells but also of other cells, including T-lymphocytes, B-cells, chondrocytes, and neural crest cells [26,30,31,74–77], and they also play essential roles in gene regulation. These considerations explain quite well why SRF evolves at nearly the same conservational level with MEF2A, MEF2C, and MEF2D, except slower than MEF2B.

In summary, we have constructed the phylogeny of the MEF2 genes, and revealed that the function of MEF2B is somewhat less important than the other three MEF2 members in vertebrates, which is consistent with functional research from previous experimental observations. To circumvent putative problems with redundancy between MEF2B and other MEF2 proteins, generation of double or multiple MEF2 knockouts is especially interesting and would provide a deeper comprehension of the different and/or overlapping functional roles of the four MEF2 members in vertebrates.

## Materials and Methods

### Data collection and alignment

Orthologous and paralogous MEF2 sequences (As a total of 102 sequences, see File S1) were obtained from The National Center for Biotechnology Information (NCBI) using BLASTP, TBLASTN, and key words searches [74]. The MEF2 amino acid sequences were aligned by the program MUSCLE, and poorly aligned positions and divergent regions (*e.g.* a number of indels and/or mismatches) were eliminated by the program Gblocks in combination with manual edition. The alignment result (see File S2) was used to construct the MEF2 phylogeny. On the other hand, a Perl script was written to capture the open reading frames (excluding 5'-UTR and 3'-UTR) by using the corresponding MEF2 protein sequences against the corresponding mRNA sequences (see File S3). Thereafter, MEF2 coding sequences were aligned according to the previous alignment of MEF2 protein sequences by ClustalW as implemented in MEGA4 [78]. Because the regions C-terminal to MEF2s domains are two divergent among the four MEF2A-D branches, it is not appropriate to calculate nonsynonymous and synonymous substitution rates and their ratios ( $\omega = K_a/K_s$ ) [79], therefore, just the MADS and MEF2s domains were used for the analyses. The alignment result (see File S4) of MADS and MEF2s coding regions was used to calculate  $K_a$ ,  $K_s$ , and their ratios by PAML4 (Phylogenetic Analysis by Maximum Likelihood, version 4).

### Phylogenetic analysis

The MEF2 phylogenetic tree was constructed by Neighbor-Joining (NJ) method with 500 bootstrap replicates, poisson-correction (PC) distance, and pairwise deletion options as implemented in MEGA 4 [78]. In addition, MrBayes 3.1 [48] with default model and priors was used to construct MEF2 Bayesian phylogenetic tree. Searches were started from a random tree (nruns = 1) with 4 heated chains (temp = 0.05) and 300,000 iterations, the initial 5,000 trees were discarded, and finally a consensus tree using the Bayesian posterior probabilities (PPs) to evaluate branch support was constructed. The consensus Bayesian tree (see Figure S1) is broadly consistent with the former NJ tree.

### Detection of evolutionary rates for MADS and MEF2s coding regions

To test whether there were different evolutionary rates among MEF2A-D proteins in vertebrates, the YN00 program [59] of

PAML4 [53] was used to estimate substitution rates of MEF2 coding sequences by pairwise calculation of  $K_a/K_s$  between mice and humans (see Table 1). To our knowledge, a high evolutionary rate is thought to originate from two possible ways: one is simply a long-term accumulation of substitutions because of relaxed natural selection; the other is an abrupt increase of substitutions in an episodic period because of functional divergence. To test which scenario brings the increase of MEF2B evolutionary rate, the CODEML program of PAML4 [53] was used to implement models that allow for different  $\omega$  parameters in different parts of the MEF2A-D phylogeny (see Figure S2). The simplest model, referred to as null hypothesis H0, assumes the same  $\omega$  ratio for all branches in the phylogeny. Other models, referred to as alternatives, specify independent  $\omega$  ratio for the corresponding branch in the phylogeny (see Table 2). The likelihood ratio test (LRT) [52] was applied to measure the statistical significance of each pair of nested models.

Since positive selection is likely to act on a small subset of sites in a protein and thus averages of substitution rates across a protein with lower than 1 may not represent that all the sites in the protein are under negative selection. Besides, even though all the sites in a protein are under negative selection, various negative selection pressures still may appear in different domains in a protein. To test whether some sites in MADS and MEF2s regions are under positive selection, we used two pair models from the CODEML program [53]: M1a (Nearly Neutral) against M2a (Positive Selection); and M7 (beta) against M8 (beta &  $\omega$ ). M1a allows two classes of  $\omega$  sites: negative sites with  $\omega_0 < 1$  estimated from our data and neutral sites with  $\omega_1 = 1$ , whereas M2a adds a third class with  $\omega_2$  possibly  $> 1$  estimated from our data. M7 allows ten classes of  $\omega$  sites between 0 and 1 according to a beta distribution with parameters  $p$  and  $q$ , whereas M8 adds an additional class with  $\omega$  possibly  $> 1$  as M2a does. In both comparisons, degree of freedom (*df*) is 2. In addition, to test whether variable selection pressures exist among MADS/MEF2s sites, we used a pair model also from the CODEML program [53]: M0 (one ratio) against M3 (discrete). M0 specifies a single  $\omega$  ratio for all MEF2 coding sites, whereas M3 specifies MEF2 coding sites into 3 discrete classes. Degree of freedom for this comparison is 4.

In addition, to reveal whether there are some sites along particular MEF2 branches, we also did branch-site analyses employing the Test 2 [80] of the null model A H0 (model = 2 NSsites = 2) with  $\omega_2$  fixed to 1 in comparison to alternative model A H1 with  $\omega_2$  to be estimated [53]. In contrast to 3.84 for 5% and 6.63 for 1% for  $\chi^2_1$ , the critical values are 2.71 at 5% and 5.41 at 1% [53] given that the null distribution (the branch-site model we used here) is the 50:50 mixture of point mass 0 and  $\chi^2_1$ .

To compare evolutionary rate between type I and type II MADS factors in animals, substitution rates (see Figure 2) of SRF and MEF2A-D were calculated in humans and mice by using dogs and cows as outgroups. Here, substitution rate was simply determined as mutation rate per site [81] across coding sequences.

## Supporting Information

**File S1** A total of 102 MEF2 protein sequences. (FASTA)

**File S2** Alignment result for the 102 MEF2 protein sequences. (PDF)

**File S3** A total of 102 MEF2 coding sequences excluding 5'-UTR and 3'-UTR. (FASTA)

**File S4** Alignment result of the MADS and MEF2s coding regions for the MEF2A, B, C, and D branches. (PDF)

**Figure S1** MEF2 Bayesian tree. (PDF)

**Figure S2** Different  $\omega$  parameters for different parts of the MEF2A-D phylogeny. (PDF)

## References

- Martin JF, Miano JM, Hustad CM, Copeland NG, Jenkins NA, et al. (1994) A Mef2 gene that generates a muscle-specific isoform via alternative mRNA splicing. *Mol Cell Biol* 14: 1647–1656.
- Black BL, Olson EN (1998) Transcriptional control of muscle development by myocyte enhancer factor-2 (MEF2) proteins. *Annu Rev Cell Dev Biol* 14: 167–196.
- Zhu B, Gulick T (2004) Phosphorylation and alternative pre-mRNA splicing converge to regulate myocyte enhancer factor 2C activity. *Molecular and cellular biology* 24: 8264.
- Zhu B, Ramachandran B, Gulick T (2005) Alternative pre-mRNA splicing governs expression of a conserved acidic transactivation domain in myocyte enhancer factor 2 factors of striated muscle and brain. *Journal of Biological Chemistry* 280: 28749.
- Martin JF, Schwarz JJ, Olson EN (1993) Myocyte enhancer factor (MEF) 2C: a tissue-restricted member of the MEF-2 family of transcription factors. *Proc Natl Acad Sci U S A* 90: 5282–5286.
- Hobson GM, Krahe R, Garcia E, Siciliano MJ, Funanage VL (1995) Regional chromosomal assignments for four members of the MADS domain transcription enhancer factor 2 (MEF2) gene family to human chromosomes 15q26, 19p12, 5q14, and 1q12-q23. *Genomics* 29: 704–711.
- Pollock R, Treisman R (1991) Human SRF-related proteins: DNA-binding properties and potential regulatory targets. *Genes Dev* 5: 2327–2341.
- Andres V, Cervera M, Mahdavi V (1995) Determination of the consensus binding site for MEF2 expressed in muscle and brain reveals tissue-specific sequence constraints. *J Biol Chem* 270: 23246–23249.
- Molkentin JD, Black BL, Martin JF, Olson EN (1996) Mutational analysis of the DNA binding, dimerization, and transcriptional activation domains of MEF2C. *Mol Cell Biol* 16: 2627–2636.
- McKinsey TA, Zhang CL, Olson EN (2002) MEF2: a calcium-dependent regulator of cell division, differentiation and death. *Trends Biochem Sci* 27: 40–47.
- Kato Y, Kravchenko VV, Tapping RI, Han J, Ulevitch RJ, et al. (1997) BMK1/ERK5 regulates serum-induced early gene expression through transcription factor MEF2C. *The EMBO journal* 16: 7054.
- Yan C, Takahashi M, Okuda M, Lee JD, Berk BC (1999) Fluid shear stress stimulates big mitogen-activated protein kinase 1 (BMK1) activity in endothelial cells. *Journal of Biological Chemistry* 274: 143.
- Nadrusz Jr W, Kobarg CB, Constancio SS, Corat P, Franchini KG (2003) Load-induced transcriptional activation of c-jun in rat myocardium: regulation by myocyte enhancer factor 2. *Circulation research* 92: 243.
- Edmondson DG, Lyons GE, Martin JF, Olson EN (1994) Mef2 gene expression marks the cardiac and skeletal muscle lineages during mouse embryogenesis. *Development* 120: 1251.
- Potthoff MJ, Olson EN (2007) MEF2: a central regulator of diverse developmental programs. *Development* 134: 4131–4140.
- Black BL, Cripps RM (2010) Myocyte enhancer factor-2 transcription factors in heart development and disease. In: Nadia R, Richard PH, eds. *Heart Development and regeneration*. San Diego: Academic Press. pp 673–699.
- Molkentin JD, Black BL, Martin JF, Olson EN (1995) Cooperative activation of muscle gene expression by MEF2 and myogenic bHLH proteins. *Cell* 83: 1125–1136.
- Ornatsky OI, Andreucci JJ, McDermott JC (1997) A dominant-negative form of transcription factor MEF2 inhibits myogenesis. *Journal of Biological Chemistry* 272: 33271.
- Cripps RM, Zhao B, Olson EN (1999) Transcription of the myogenic regulatory gene Mef2 in cardiac, somatic, and visceral muscle cell lineages is regulated by a Timman-dependent core enhancer. *Developmental biology* 215: 420–430.
- Andres V, Fisher S, Wearsch P, Walsh K (1995) Regulation of Gax homeobox gene transcription by a combination of positive factors including myocyte-specific enhancer factor 2. *Molecular and cellular biology* 15: 4272.
- Vanpoucke G, Goossens S, De Craene B, Gilbert B, Van Roy F, et al. (2004) GATA-4 and MEF2C transcription factors control the tissue-specific expression of the  $\{\alpha\}$  T-catenin gene CTNNA3. *Nucleic acids research* 32: 4155.
- Morin S, Charron F, Robitaille L, Nemer M (2000) GATA-dependent recruitment of MEF2 proteins to target promoters. *The EMBO Journal* 19: 2046–2055.
- Shalizi AK, Bonni A (2005) brawn for brains: the role of MEF2 proteins in the developing nervous system. *Curr Top Dev Biol* 69: 239–266.
- Choi DW (1994) Calcium and excitotoxic neuronal injury. *Annals of the New York Academy of Sciences* 747: 162–171.
- Rao S, Karray S, Gackstetter ER, Koshland ME (1998) Myocyte enhancer factor-related B-MEF2 is developmentally expressed in B cells and regulates the immunoglobulin J chain promoter. *Journal of Biological Chemistry* 273: 26123.
- Wallin JJ, Rinkenberger JL, Rao S, Gackstetter ER, Koshland ME, et al. (1999) B cell-specific activator protein prevents two activator factors from binding to the immunoglobulin J chain promoter until the antigen-driven stages of B cell development. *Journal of Biological Chemistry* 274: 15959.
- Sharma G, Goalstone ML (2005) Dominant negative FTase (DNFT [ $\alpha$ ]) inhibits ERK5, MEF2C and CREB activation in adipogenesis. *Molecular and cellular endocrinology* 245: 93–104.
- Hosking BM, Wang SC, Chen SL, Penning S, Koopman P, et al. (2001) SOX18 directly interacts with MEF2C in endothelial cells. *Biochemical and Biophysical Research Communications* 287: 493–500.
- Lin Q, Lu J, Yanagisawa H, Webb R, Lyons GE, et al. (1998) Requirement of the MADS-box transcription factor MEF2C for vascular development. *Development* 125: 4565.
- Arnold MA, Kim Y, Czubyryt MP, Phan D, McAnally J, et al. (2007) MEF2C transcription factor controls chondrocyte hypertrophy and bone development. *Developmental Cell* 12: 377–389.
- Verzi MP, Agarwal P, Brown C, McCulley DJ, Schwarz JJ, et al. (2007) The transcription factor MEF2C is required for craniofacial development. *Developmental cell* 12: 645–652.
- Nowakowska BA, Obersztyn E, Szymanska K, Bekiesinska-Figatowska M, Xia Z, et al. (2010) Severe Mental Retardation, Seizures, and Hypotonia Due to Deletions of MEF2C. *Am J Med Genet B Neuropsychiatr Genet* 153B: 1042–1051.
- Sablowski R (2010) Genes and functions controlled by floral organ identity genes. *Semin Cell Dev Biol* 21: 94–99.
- Alvarez-Buylla ER, Azpeitia E, Barrio R, Benitez M, Padilla-Longoria P (2010) From ABC genes to regulatory networks, epigenetic landscapes and flower morphogenesis: making biological sense of theoretical approaches. *Semin Cell Dev Biol* 21: 108–117.
- Litt A, Kramer EM (2010) The ABC model and the diversification of floral organ identity. *Semin Cell Dev Biol* 21: 129–137.
- Vision TJ, Brown DG, Tanksley SD (2000) The origins of genomic duplications in Arabidopsis. *Science* 290: 2114.
- De Bodt S, Raes J, Florkin K, Rombauts S, Rouze P, et al. (2003) Genomewide structural annotation and evolutionary analysis of the type I MADS-box genes in plants. *J Mol Evol* 56: 573–586.
- Parenicova R, De Folter S, Kieffer M, Horner DS, Favalli C, et al. (2003) Molecular and phylogenetic analyses of the complete MADS-box transcription factor family in Arabidopsis: new openings to the MADS world. *Plant Cell* 15: 1538–1551.
- Shan H, Zahn L, Guindon S, Wall PK, Kong H, et al. (2009) Evolution of plant MADS box transcription factors: evidence for shifts in selection associated with early angiosperm diversification and concerted gene duplications. *Mol Biol Evol* 26: 2229–2244.
- Jimenez S, Lawton-Rauh AL, Reighard GL, Abbott AG, Bielenberg DG (2009) Phylogenetic analysis and molecular evolution of the dormancy associated MADS-box genes from peach. *BMC Plant Biol* 9: 81.
- Hernandez-Hernandez T, Martinez-Castilla LP, Alvarez-Buylla ER (2007) Functional diversification of B MADS-box homeotic regulators of flower development: Adaptive evolution in protein-protein interaction domains after major gene duplication events. *Mol Biol Evol* 24: 465–481.
- Martinez-Castilla LP, Alvarez-Buylla ER (2003) Adaptive evolution in the Arabidopsis MADS-box gene family inferred from its complete resolved phylogeny. *Proc Natl Acad Sci U S A* 100: 13407–13412.
- Santelli E, Richmond TJ (2000) Crystal structure of MEF2A core bound to DNA at 1.5 Å resolution. *J Mol Biol* 297: 437–449.
- Huang K, Louis JM, Donaldson L, Lim FL, Sharrocks AD, et al. (2000) Solution structure of the MEF2A-DNA complex: structural basis for the modulation of

## Acknowledgments

We are grateful to the members at the Bioinformatics Center of Northwest A&F University for useful discussion, to Prof. Hongzhi Kong for technical advice, and to the two anonymous reviewers for insightful comments and suggestions on the manuscript.

## Author Contributions

Conceived and designed the experiments: WWW SHT XS. Performed the experiments: WWW XS. Analyzed the data: WWW WQZ SDF. Contributed reagents/materials/analysis tools: WWW SDF. Wrote the paper: WWW SDF.



- DNA bending and specificity by MADS-box transcription factors. *EMBO J* 19: 2615–2628.
45. Brand NJ (1997) Myocyte enhancer factor 2 (MEF2). *Int J Biochem Cell Biol* 29: 1467–1470.
  46. Wu WW, Huang XT, Cheng J, Li ZG, Stefan DF, et al. (2011) Conservation and evolution in and among SRF- and MEF2-type MADS domains and their binding sites. *Mol Biol Evol* 28: 501–511.
  47. Saitou N, Nei M (1987) The neighbor-joining method: a new method for reconstructing phylogenetic trees. *Mol Biol Evol* 4: 406–425.
  48. Huelsenbeck JP, Ronquist F (2001) MRBAYES: Bayesian inference of phylogenetic trees. *Bioinformatics* 17: 754–755.
  49. Sonnhammer E, Koonin EV (2002) Orthology, paralogy and proposed classification for paralog subtypes. *Trends in Genetics* 18: 619–620.
  50. Hurst LD (2002) The Ka/Ks ratio: diagnosing the form of sequence evolution. *Trends Genet* 18: 486.
  51. Bielawski JP, Yang Z (2005) Maximum likelihood methods for detecting adaptive protein evolution. *Statistical Methods in Molecular Evolution*. pp 103–124.
  52. Yang Z (1998) Likelihood ratio tests for detecting positive selection and application to primate lysozyme evolution. *Molecular Biology and Evolution* 15: 568.
  53. Yang Z (2007) PAML 4: phylogenetic analysis by maximum likelihood. *Mol Biol Evol* 24: 1586–1591.
  54. Alvarez-Buylla ER, Pelaz S, Liljegren SJ, Gold SE, Burgeff C, et al. (2000) An ancestral MADS-box gene duplication occurred before the divergence of plants and animals. *Proc Natl Acad Sci USA* 97: 5328–5333.
  55. Nam J, Kim J, Lee S, An G, Ma H, et al. (2004) Type I MADS-box genes have experienced faster birth-and-death evolution than type II MADS-box genes in angiosperms. *Proc Natl Acad Sci U S A* 101: 1910–1915.
  56. De Bodt S, Raes J, Florquin K, Rombauts S, Rouze P, et al. (2003) Genomewide structural annotation and evolutionary analysis of the type I MADS-box genes in plants. *J Mol Evol* 56: 573–586.
  57. Putnam NH, Srivastava M, Hellsten U, Dirks B, Chapman J, et al. (2007) Sea anemone genome reveals ancestral eumetazoan gene repertoire and genomic organization. *Science* 317: 86–94.
  58. Foltz DR, Jansen L, Bailey AO, Yates III JR, Bassett EA, et al. (2009) Centromere-specific assembly of CENP-a nucleosomes is mediated by HJURP. *Cell* 137: 472–484.
  59. Yang Z, Nielsen R (2000) Estimating synonymous and nonsynonymous substitution rates under realistic evolutionary models. *Mol Biol Evol* 17: 32–43.
  60. Bult CJ, Eppig JT, Kadin JA, Richardson JE, Blake JA (2008) The Mouse Genome Database (MGD): mouse biology and model systems. *Nucleic Acids Research* 36: D724.
  61. Naya FJ, Black BL, Wu H, Bassel-Duby R, Richardson JA, et al. (2002) Mitochondrial deficiency and cardiac sudden death in mice lacking the MEF2A transcription factor. *Nature medicine* 8: 1303–1309.
  62. Lin Q, Schwarz J, Bucana C (1997) Control of mouse cardiac morphogenesis and myogenesis by transcription factor MEF2C. *Science* 276: 1404.
  63. Vong L, Bi W, O'Connor-Halligan KE, Li C, Cserjesi P, et al. (2006) MEF2C is required for the normal allocation of cells between the ventricular and sinoatrial precursors of the primary heart field. *Developmental Dynamics* 235: 1809–1821.
  64. Kumar S, Subramanian S (2002) Mutation rates in mammalian genomes. *Proceedings of the National Academy of Sciences of the United States of America* 99: 803.
  65. Gu X, Li WH (1992) Higher rates of amino acid substitution in rodents than in humans. *Molecular Phylogenetics and Evolution* 1: 211–214.
  66. Bromham L (2009) Why do species vary in their rate of molecular evolution? *Biology Letters* 5: 401–404.
  67. Wu CI, Li WH (1985) Evidence for higher rates of nucleotide substitution in rodents than in man. *Proc Natl Acad Sci U S A* 82: 1741–1745.
  68. Martin AP, Palumbi SR (1993) Body size, metabolic rate, generation time, and the molecular clock. *Proceedings of the National Academy of Sciences of the United States of America* 90: 4087.
  69. De Bodt S, Raes J, Van de Peer Y, Theissen G (2003) And then there were many: MADS goes genomic. *Trends Plant Sci* 8: 475–483.
  70. Cooper SJ, Trinklein ND, Nguyen L, Myers RM (2007) Serum response factor binding sites differ in three human cell types. *Genome Res* 17: 136–144.
  71. Sun Q, Chen G, Streb JW, Long X, Yang Y, et al. (2006) Defining the mammalian CArGome. *Genome Res* 16: 197–207.
  72. Wu WW, Shen X, Tao SH (2010) Characteristics of the CArG-SRF binding context in mammalian genomes. *Mammalian Genome* 21: 104–113.
  73. Arsenian S, Weinhold B, Oelgeschlager M, Ruther U, Nordheim A (1998) Serum response factor is essential for mesoderm formation during mouse embryogenesis. *EMBO J* 17: 6289–6299.
  74. Wheeler DL, Barrett T, Benson DA, Bryant SH, Canese K, et al. (2007) Database resources of the National Center for Biotechnology Information. *Nucleic Acids Res* 35: D5–D12.
  75. Youn HD, Sun L, Prywes R, Liu JO (1999) Apoptosis of T cells mediated by Ca<sup>2+</sup>-induced release of the transcription factor MEF2. *Science* 286: 790.
  76. Youn HD, Liu JO (2000) Cabin1 represses MEF2-dependent Nur77 expression and T cell apoptosis by controlling association of histone deacetylases and acetylases with MEF2. *Immunity* 13: 85–94.
  77. Wilker PR, Kohyama M, Sandau MM, Albring JC, Nakagawa O, et al. (2008) Transcription factor Mef2c is required for B cell proliferation and survival after antigen receptor stimulation. *Nature immunology* 9: 603–612.
  78. Tamura K, Dudley J, Nei M, Kumar S (2007) MEGA4: molecular evolutionary genetics analysis (MEGA) software version 4.0. *Molecular biology and evolution* 24: 1596.
  79. Stark A, Lin MF, Kheradpour P, Pedersen JS, Parts L, et al. (2007) Discovery of functional elements in 12 Drosophila genomes using evolutionary signatures. *Nature* 450: 219–232.
  80. Zhang J, Nielsen R, Yang Z (2005) Evaluation of an improved branch-site likelihood method for detecting positive selection at the molecular level. *Mol Biol Evol* 22: 2472–2479.
  81. Kimura M (1985) *The neutral theory of molecular evolution*. Cambridge: Cambridge University Press.
