# Supplementary material for: Vertebrate Paralogous MEF2 Genes: Origin, Conservation, and Evolution
Source: PubMed Central journal article supplement (PMC3048864; doi:10.1371/journal.pone.0017334), 2011-03-04

CanF\_MEF2A --ADDFEHSPLSEDRFSKLNEDSDFI-----KRGPPGLPPQNFMSMSTVVPVTSNALSVTNPGSSLVSPSLAASSTLAD--SMLSPPQATLHRN-- 188
MacM\_MEF2A --ADDFEHSPLSEDRFSKLNEDSDFI-----KRGPPGLPPQNFMSMSTVVPVTSNALSVTNPGSSLVSPSLAASSTLTD--SMLSPPQATLHRN-- 188
PanT\_MEF2A --ADDFEHSPLSEDRFSKLNEDSDFI-----KRGPPGLPPQNFMSMSTVVPVTSNALSVTNPGSSLVSPSLAASSTLTD--SMLSPPQATLHRN-- 188
SusS\_MEF2A P--DTYVL--HPHEEKYKKNIEEFDNMM--RNHKGPLPPQNFMSMSTVVPVTSNALSVTNPGSSLVSPSLAASSTLAD--SMLSPPQATLHRN-- 187
EquC\_MEF2A P--DTYVL--HPHEEKYKKNIEEFDNMM--RNHKGPLPPQNFMSMSTVVPVTSNALSVTNPGSSLVSPSLAASSTLAD--SMLSPPQATLHRN-- 187
PonA\_MEF2A --ADDFEHSPLSEDRFSKLNEDSDFI-----KRGPPGLPPQNFMSMSTVVPVTSNALSVTNPGSSLVSPSLAASSTLTD--SMLSPPQATLHRN-- 188
HomS\_MEF2A --ADDFEHSPLSEDRFSKLNEDSDFI-----KRGPPGLPPQNFMSMSTVVPVTSNALSVTNPGSSLVSPSLAASSTLTD--SMLSPPQATLHRN-- 188
CalJ\_MEF2A --ADDFEHSPLSEDRFSKLNEDSDFI-----KRGPPGLPPQNFMSMSTVVPVTSNALSVTNPGSSLVSPSLAASSTLTD--SMLSPPQATLHRN-- 188
AilM\_MEF2A --ADDFEHSPLSEDRFSKLNEDSDFI-----KRGPPGLPPQNFMSMSTVVPVTSNALSVTNPGSSLVSPSLAASSTLAD--SMLSPPQATLHRN-- 188
MusM\_MEF2A --ADDFEHSPLSEDRFSKLNEDSDFI-----KRGPPGLPPQNFMSMSTVVPVTSNALSVTNPGSSLVSPSLAASSTLAD--SMLSPPQATLHRN-- 188
DanR\_MEF2A P--DDCFGHSPLMDRFGKLNEDSDLMY--KRGPPGLPPQNFMSMSTVVPVTSNALSVTNPGSSLVSPSLAASSTLAD--SMLSPPQATLHRN-- 187
GalG\_MEF2A --ADDFEHSPLSEDRFSKLNEDSDFI-----KRGPPGLPPQNFMSMSTVVPVTSNALSVTNPGSSLVSPSLAASSTLTD--SMLSPPQATLHRN-- 188
RatN\_MEF2A P--DTYVL--HPHEEKYKKNIEEFDNMM--RNHKGPLPPQNFMSMSTVVPVTSNALSVTNPGSSLVSPSLAASSTLAD--SMLSPPQATLHRN-- 187
BosT\_MEF2A P--DTYVL--HPHEEKYKKNIEEFDNMM--RNHKGPLPPQNFMSMSTVVPVTSNALSVTNPGSSLVSPSLAASSTLAD--SMLSPPQATLHRN-- 187
MonD\_MEF2A --ADDFEHSPLSEDRFSKLNEDSDFI-----KRGPPGLPPQNFMSMSTVVPVTSNALSVTNPGSSLVSPSLAASSTLTD--SMLSPPQATLHRN-- 187
XenL\_MEF2A P--DGYVL--HPHEEKYKKNIEEFDNMM--RSHKPGPLPQPTFMSVTSVPSNPTLTYSSPGNMTVMTASLAASSTLTDARMLSPPTTLHRN-- 187
OrnA\_MEF2A --ADDFEHSPLSEDRFSKLNEDSDFI-----KRGPPGLPPQNFMSMSTVVPVTSNALSVTNPGSSLVSPSLAASSTLAD--SMLSPPQATLHRN-- 188
TaeG\_MEF2A --ADDFEHSPLSEDRFSKLNEDSDFI-----KRGPPGLPPQNFMSMSTVVPVTSNALSVTNPGSSLVSPSLAASSTLTD--SMLSPPQATLHRN-- 188
OryC\_MEF2A --ADDFEHSPLSEDRFSKLNEDSDFI-----KRGPPGLPPQNFMSMSTVVPVTSNALSVTNPGSSLVSPSLAASSTLAD--SMLSPPQATLHRN-- 177
CanF\_MEF2C PDADDSVGHSPSEDKYRKINEDIDLMI--SRQLCAVPPPNFEMPVSIPIVSSHNSLVSNPVSSLGNPNLL--PLAH-----PSLQRNS 181
MacM\_MEF2C PDADDSVGHSPSEDKYRKINEDIDLMI--SRQLCAVPPPNFEMPVSIPIVSSHNSLVSNPVSSLGNPNLL--PLAH-----PSLQRNS 181
PanT\_MEF2C PD--SSYAL--HPRIEEKYKKNIEEFDNMI--KSHKIPAVPPPNFEMPVSIPIVSSHNSLVSNPVSSLGNPNLL--PLAH-----PSLQRNS 179
SusS\_MEF2C PDADDSVGHSPSEDKYRKINEDIDLMI--SRQLCAVPPPNFEMPVSIPIVSSHNSLVSNPVSSLGNPNLL--PLAH-----PSLQRNS 181
EquC\_MEF2C PDADDSVGHSPSEDKYRKINEDIDLMI--SRQLCAVPPPNFEMPVSIPIVSSHNSLVSNPVSSLGNPNLL--PLAH-----PSLQRNS 181
PonA\_MEF2C PDADDSVGHSPSEDKYRKINEDIDLMI--SRQLCAVPPPNFEMPVSIPIVSSHNSLVSNPVSSLGNPNLL--PLAH-----PSLQRNS 181
HomS\_MEF2C PD--SSYAL--HPRIEEKYKKNIEEFDNMI--KSHKIPAVPPPNFEMPVSIPIVSSHNSLVSNPVSSLGNPNLL--PLAH-----PSLQRNS 179
CalJ\_MEF2C PDADDSVGHSPSEDKYRKINEDIDLMI--SRQLCAVPPPNFEMPVSIPIVSSHNSLVSNPVSSLGNPNLL--PLAH-----PSLQRNS 181
AilM\_MEF2C PDADDSVGHSPSEDKYRKINEDIDLMI--SRQLCAVPPPNFEMPVSIPIVSSHNSLVSNPVSSLGNPNLL--PLAH-----PSLQRNS 181
MusM\_MEF2C PDADDSVGHSPSEDKYRKINEDIDLMI--SRQLCAVPPPNFEMPVSIPIVSSHNSLVSNPVSSLGNPNLL--PLAH-----PSLQRNS 181
GalG\_MEF2C PDADDSVGHSPSEDKYRKINEDIDLMI--SRQLCAVPPPNFEMPVSIPIVSSHNSLVSNPVSSLGNPNLL--PLAH-----PSLQRNS 181
RatN\_MEF2C PDADDSVGHSPSEDKYRKINEDIDLMI--SRQLCAVPPPNFEMPVSIPIVSSHNSLVSNPVSSLGNPNLL--PLAH-----PSLQRNS 181
BosT\_MEF2C PDADDSVGHSPSEDKYRKINEDIDLMI--SRQLCAVPPPNFEMPVSIPIVSSHNSLVSNPVSSLGNPNLL--PLAH-----PSLQRNS 181
XenT\_MEF2C PDADDSVGHSPSEDKYRKINEDIDLMI--SRQLCAVPPPNFEMPVSIPIVSSHNSLVSNPVSSLGNPNLL--PLSH-----PSLHRNS 181
MonD\_MEF2C PDADDSVGHSPSEDKYRKINEDIDLMI--SRQLCAVPPPNFEMPVSIPIVSSHNSLVSNPVSSLGNPNLL--PLAH-----PSLQRNS 181
XenL\_MEF2C PDADDSVGHSPSEDKYRKINEDIDLMI--SRQLCAVPPPNFEMPVSIPIVSSHNSLVSNPVSSLGNPNLL--PLSH-----PSLHRNS 181
OrnA\_MEF2C PDADDSVGHSPSEDKYRKINEDIDLMI--SRQLCAVPPPNFEMPVSIPIVSSHNSLVSNPVSSLGNPNLL--PLAH-----PSLQRNS 181
TaeG\_MEF2C PDADDSVGHSPSEDKYRKINEDIDLMI--SRQLCAVPPPNFEMPVSIPIVSSHNSLVSNPVSSLGNPNLL--PLAH-----PSLQRNS 181
OviA\_MEF2C PDADDSVGHSPSEDKYRKINEDIDLMI--SRQLCAVPPPNFEMPVSIPIVSSHNSLVSNPVSSLGNPNLL--PLAH-----PSLQRNS 181
OryC\_MEF2C PDADDSVGHSPSEDKYRKINEDIDLMI--SRQLCAVPPPNFEMPVSIPIVSSHNSLVSNPVSSLGNPNLL--PLAH-----PSLQRNS 181
DanR\_MEF2Ca IDAEDS--GHSPESEDKYRKINEDIDLMI--SRQLCAIPQSNIDMVPVSIPIVSNPLIYGHGPGASLGNPNLL--PLTH-----PSLQRNS 180
DanR\_MEF2Cb PDADDSVGHSPSEDKYRKINEDIDLMI--SRQRICAVPSSTYDM--ITPVNNO--IY--PG-----NHNLL--PLAH-----HGLQRNS 170
CanF\_MEF2D PDGEDSLEQSPLEEDKYRRASEELDGLF--RRYGSVAVPAPNFAMPVTVVPSNQSSLOFSNPGSLVTPSLVTSSLTDRPRLSSPQ--PALQRNS 190
MacM\_MEF2D PDGEDSLEQSPLEEDKYRRASEELDGLF--RRYGSVAVPAPNFAMPVTVVPSNQSSLOFSNPGSLVTPSLVTSSLTDRPRLSSPQ--PALQRNS 190
PanT\_MEF2D PDGEDSLEQSPLEEDKYRRASEELDGLF--RRYGSVAVPAPNFAMPVTVVPSNQSSLOFSNPGSLVTPSLVTSSLTDRPRLSSPQ--PALQRNS 190
SusS\_MEF2D PDGEDSLEQSPLEEDKYRRASEELDGLF--RRYGSVAVPAPNFAMPVTVVPSNQSSLOFSNPGSLVTPSLVTSSLTDRPRLSSPQ--PALQRNS 190
EquC\_MEF2D PDGEDSLEQSPLEEDKYRRASEELDGLF--RRYGSVAVPAPNFAMPVTVVPSNQSSLOFSNPGSLVTPSLVTSSLTDRPRLSSPQ--PALQRNS 190
PonA\_MEF2D PDGEDSLEQSPLEEDKYRRASEELDGLF--RRYGSVAVPAPNFAMPVTVVPSNQSSLOFSNPGSLVTPSLVTSSLTDRPRLSSPQ--PALQRNS 190
HomS\_MEF2D PDGEDSLEQSPLEEDKYRRASEELDGLF--RRYGSVAVPAPNFAMPVTVVPSNQSSLOFSNPGSLVTPSLVTSSLTDRPRLSSPQ--PALQRNS 190
CalJ\_MEF2D PDGEDSLEQSPLEEDKYRRASEELDGLF--RRYGSVAVPAPNFAMPVTVVPSNQSSLOFSNPGSLVTPSLVTSSLTDRPRLSSPQ--PALQRNS 190
AilM\_MEF2D PDGEDSLEQSPLEEDKYRRASEELDGLF--RRYGSVAVPAPNFAMPVTVVPSNQSSLOFSNPGSLVTPSLVTSSLTDRPRLSSPQ--PALQRNS 185
MusM\_MEF2D PDGEDSLEQSPLEEDKYRRASEELDGLF--RRYGSVAVPAPNFAMPVTVVPSNQSSLOFSNPGSLVTPSLVTSSLTDRPRLSSPQ--PALQRNS 190
DanR\_MEF2D PEE--PFSITLPRHEEKYKKNIEEFDKMM--QYRSTVPAPTSMPTVTVVPSNQSSLOFSPSNPS--SLVTTSFVTSLTDRPRLSSPQ--PQLQRNT 187
GalG\_MEF2D PDGDDSIDQSPLMEDKYRRASEELDILF--RRYGSVAVPAPNFAMPVTVVPSNQSSLOFSNPGSLVTPSLVTSSLTDRPRLSSPQ--PQLQRNT 190
RatN\_MEF2D PDGEDSLEQSPLEEDKYRRASEELDGLF--RRYGSVAVPAPNFAMPVTVVPSNQSSLOFSNPGSLVTPSLVTSSLTDRPRLSSPQ--PALQRNS 190
BosT\_MEF2D PDGEDSLEQSPLEEDKYRRASEELDGLF--RRYGSVAVPAPNFAMPVTVVPSNQSSLOFSNPGSLVTPSLVTSSLTDRPRLSSPQ--PALQRNS 190
XenT\_MEF2D PDGDDSIDQSPLMEDKYRRASEELDILF--RRYGSVAVPAPNFAMPVTVVPSNQSSLOFSNPGSLVTPSLVTSSLTDRPRLSSPQ--PALQRNT 190
MonD\_MEF2D PDGEDSLEQSPLEEDKYRRASEELDGLF--RRYGSVAVPAPNFAMPVTVVPSNQSSLOFSNPGSLVTPSLVTSSLTDRPRLSSPQ--PALQRNS 190
TaeG\_MEF2D PDGDDSIDQSPLMEDKYRRASEELDILF--RRYGSVAVPAPNFAMPVTVVPSNQSSLOFSNPGSLVTPSLVTSSLTDRPRLSSPQ--PALQRNT 190
OryC\_MEF2D PDGEDSLEQSPLEEDKYRRASEELDGLF--RRYGSVAVPAPNFAMPVTVVPSNQSSLOFSNPGSLVTPSLVTSSLTDRPRLSSPQ--PALQRNS 190
XenL\_MEF2Db PDGDDSIDQSPLMEDKYRRASEELDILF--RRYGSVAVPAPNFAMPVTVVPSNQSSLOFSNPGSLVTPSLVTSSLTDRPRLSSPQ--SALQRNT 190
XenL\_MEF2Da PDGDDSIDQSPLMEDKYRRASEELDILF--RRYGSVAVPAPNFAMPVTVVPSNQSSLOFSNPGSLVTPSLVTSSLTDRPRLSSPQ--PQLQRNT 190
CanF\_MEF2B ---LEPDEGPEEPGEKLRRLA--GEGGDPALPR--PRL--YPAAPAMPSPD 141
MacM\_MEF2B ---MEPDEGPEEPGEKFRRLA--GEGGDPALPR--PRL--YPAAPAMPSPD 141
PanT\_MEF2B ---LEPDEGPEEPGEKFRRLA--GEGGDPALPR--PRL--YPAAPAMPSPD 141
EquC\_MEF2B ---LDPDEGPEEPGEKLRRLA--GEGGDPALPR--PRL--YPAAPAMPSPD 141
PonA\_MEF2B ---LEPDEGPEEPGEKFRRLA--GEGGDPALPR--PRL--YPAAPAMPSPD 141
HomS\_MEF2B ---LEPDEGPEEPGEKFRRLA--GEGGDPALPR--PRL--YPAAPAMPSPD 141
CalJ\_MEF2B ---LEPDEGPEEPGEKFRRLA--GEGGDPALPR--PRL--YPAAPAMPSPD 141
AilM\_MEF2B ---LEPDEGPEEPGEKLRRLA--GEGGDPALPR--PRL--YPAAPAMPSPD 141
MusM\_MEF2B ---LDMEEGPEEPGEKLRRLA--GEGGDPALPR--PRL--YPAAPAMPSPD 141
RatN\_MEF2B ---LDMEEGPEEPGEKLRRLA--GEGGDPALPR--PRL--YPAAPAMPSPD 141
BosT\_MEF2B ---LEPDEGPEEPGEKLRRLA--GEGGDPALPR--PRL--YPAAPAMPSPD 141
MonD\_MEF2B ---LELEEGLVPEEPGEKLRRLA--GEGGDPALPR--PRL--YPAAPAMPSPD 141
OrnA\_MEF2B ---LELDEGPAEPAEKLRLA--SDGVDLSLTR--QRL--YSAAPPLPSHN 140
DroMel\_MEF2 AET--DYTLTPRTEAKYKKNIEEFDQNMORNOQMAIGGAGAPRQLPNSSVTLVPSVVPVPGSYGDNLLQASQPMSHNTNISPRPSSSEDSVYPSGSMLEM-S 197
DroSim\_MEF2 AET--DYTLTPRTEAKYKKNIEEFDQNMORNOQMAIGGAGAPRQLPNSSVTLVPSVVPVPGSYGDNLLQASQPMSHNTNISPRPSSSEDSVYPSGSMLEM-S 197
DroAna\_MEF2 AET--DYTLTPRTEAKYKKNIEEFDQNMORNOQMAIGGAGAPRQLPNSSVTLVPSVVPVPGSYGDNLLQASQPMSHNTNISPRPSSSEDSVYPSGSMLEM-S 197
DroEre\_MEF2 AET--DYTLTPRTEAKYKKNIEEFDQNMORNOQMAIGGAGAPRQLPNSSVTLVPSVVPVPGSYGDNLLQASQPMSHNTNISPRPSSSEDSVYPSGSMLEM-S 197
DroGri\_MEF2 AEA--DYTLTPRTEAKYKKNIEEFDQNMORNOQMAI-GA-PNRPEMNTS-VTLVPSVVPVPGSYGDNLLQASQPMSHNTNISPRPSSSEDSVYPSGSMLEM-S 195
DroMoj\_MEF2 AEA--DYTLTPRTEAKYKKNIEEFDQNMORNOQMAI-GA-PNRPEMNTS-VTLVPSVVPVPGSYGDNLLQASQPMSHNTNISPRPSSSEDSVYPSGSMLEM-S 196
DroPer\_MEF2 AET--DYTLTPRTEAKYKKNIEEFDQNMORNOQMAIGVGTGAPRQLPNSSVTLVPSVVPVPGSYGDNLLQASQPMSHNTNISPRPSSSEDSVYPSGSMLEM-S 197
DroSec\_MEF2 AET--DYTLTPRTEAKYKKNIEEFDQNMORNOQMAIGGAGAPRQLPNSSVTLVPSVVPVPGSYGDNLLQASQPMSHNTNISPRPSSSEDSVYPSGSMLEM-S 197
DroVir\_MEF2 AEA--DYTLTPRTEAKYKKNIEEFDQNMORNOQMAIS-GAGAPNRAMPNTS-VTMPVTVVPSVPGSYGDNLLQASQPMSHNTNISPRPSSSEDSVYPSGSMLEM-S 197
DroWil\_MEF2 AEA--DYTLTPRTEAKYKKNIEEFDQNMORNOQMAIGGAGAPRQLPNSSVTLVPSVVPVPGSYGDNLLQASQPMSHNTNISPRPSSSEDSVYPSGSMLEM-S 197
DroYak\_MEF2 AET--DYTLTPRTEAKYKKNIEEFDQNMORNOQMAIGGAGAPRQLPNSSVTLVPSVVPVPGSYGDNLLQASQPMSHNTNISPRPSSSEDSVYPSGSMLEM-S 197
DroPse\_MEF2 AET--DYTLTPRTEAKYKKNIEEFDQNMORNOQMAIGVGTGAPRQLPNSSVTLVPSVVPVPGSYGDNLLQASQPMSHNTNISPRPSSSEDSVYPSGSMLEM-S 197
AnoG\_MEF2 PED--SYTLTPRTEAKYKKNIEEFDQIMMORNOQLS--AGGARPNMAVNSVSLVPSVPIGTYNDSMLQSSPQMAHNSISPRPSSSEDSVYPSGSMLEM-S 196
CulQ\_MEF2d PED--SYTLTPRTEAKYKKNIEEFDQIMMORNOQLS--AAGGGVGSMSNSVSLVPSVPIGTYNDSMLQSSPQMAHNSISPRPSSSEDSVYPSGSMLEM-S 196
Aea\_MEF2d PED--SYTLTPRTEAKYKKNIEEFDQIMMORNOQLS--ASQ-RVNMAGNSVSLVPSVPIGTYNDSMLQSSPQMAHNSISPRPSSSEDSVYPSGSMLEM-S 195
TriC\_MEF2 PBT--EYQLTPRTEAKYKKNIEEFDQIMMORNOQLS--INQ-RVMSGNSVSLVPSVPIGTYNDSMLQSSPQMAHNSISPRPSSSEDSVYPSGSMLEM-S 193
ApiM\_MEF2 DAI--EYNLTPRTEAKYKKNIEEFDQIMMORNOQLS--HNGTRAMGQSNVSLVPSVPIGTYNDSMLQSSPQMAHNSISPRPSSSEDSVYPSGSMLEM-S 191
BomM\_MEF2 DSEPEAYNLTPRTEAKYKKNIEEFDQIMMORNOQLS--LNGSRVGVGTGNSVSLVPSVPIGTYNDSMLQSSPQMAHNSISPRPSSSEDSVYPSGSMLEM-S 195
CioI\_MEF2 VDHQ--AQLTPGTLQRVETINKQPDMMIN--SMRPPP--QQSMPVTVVPGTGHILHGYPSPIGMHOIQHE--QPHPPNRRS-P 177
BraF\_MEF2 DQDVENLTPRTEAKYKKNIEEFDQIMMORNOQLS--MNMRTVNMPPQMPVAVVPTVQQOONILGYGAG--LLOPQOIPAR-N 172
CaeB\_MEF2 DDDSPGSPISPAIIPITPAVN--GHNSSNNSV-A 132
CaeE\_MEF2 DDESPGSPISPAIIPITPAVN--VNGHSSNNSV-A 131
CaeR\_MEF2 DDESPGSPISPAIIPITPAVN--TSNQNSV-A 132
NasV\_MEF2d PEPDQVNSLTPRTEAKYKKNIEEFDQIMMORNOQLS--RNQHGSRVYVPPGGMLM-S 148
SacK\_MEF2 PGDE--YQLTPRTEAKYKKNIEEFDQIMMORNOQLS--TVMPGSRINYPQNPVSIPIVSNMNTIYSSNASSSM--LQPHQTLGRN-S 179
GalG\_MEF2 PDGDDSIDQSPLMEDKYRRASEELDILF--RRYGSVAVPAPNFAMPVTVVPSNQSSLOFSNPGSLVTPSLVTSSLTDRPRLSSPQ--PALQRNT 183
PhyI\_MEF2 ---KKKQLQAAKEAASAAAACANAEAAANFMCGS--SNG--AAVQSYQIMHGGMNGASLGLTN 149
Schm\_MEF2a GDAVSNNDPFFNTTLDLEADVSIRGCTKPTIISVSMALFPGSIIPIKXIPGITHSVTPESITDQHNNATYAPSSMHFTSAERKKAENLMYH 200
-----110-----120-----130-----140-----150-----160-----170-----180-----190-----200

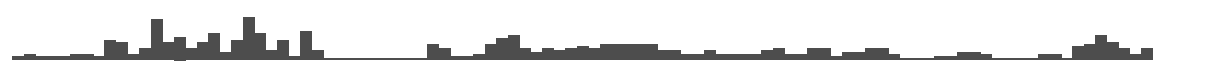







CanF\_MEF2A PPQPSQPQPQROEMGRSPVDSLSSSSS-SYDGSREDPRGDFHSPVILGRPPNTEDESPSVKRRM-DAWVT 499
MacM\_MEF2A PQQPQPQPQROEMGRSPVDSLSSSSS-SYDGSREDPRGDFHSPVILGRPPNTEDESPSVKRRM-DAWVT 495
PanT\_MEF2A PQQPQPQPQROEMGRSPVDSLSSSSS-SYDGSREDPRGDFHSPVILGRPPNTEDESPSVKRRM-DAWVT 501
SusS\_MEF2A QPQPQPQPQROEMGRSPVDSLSSSSS-SYDGSREDPRGDFHSPVILGRPPNTEDESPSVKRRM-DAWVT 504
EquC\_MEF2A PPQPQPQPQROEMGRSPVDSLSSSSS-SYDGSREDPRGDFHSPVILGRPPNTEDESPSVKRRM-DAWVT 499
PonA\_MEF2A PQQPQPQPQROEMGRSPVDSLSSSSS-SYDGSREDPRGDFHSPVILGRPPNTEDESPSVKRRM-DAWVT 494
HomS\_MEF2A PQQPQPQPQROEMGRSPVDSLSSSSS-SYDGSREDPRGDFHSPVILGRPPNTEDESPSVKRRM-DAWVT 497
CalJ\_MEF2A PQQPQPQPQROEMGRSPVDSLSSSSS-SYDGSREDPRGDFHSPVILGRPPNTEDESPSVKRRM-DAWVT 492
AilM\_MEF2A ----- 416
MusM\_MEF2A PPPQPQPQPQROEMGRSPVDSLSSSSS-SYDGSREDPRGDFHSPVILGRPPNTEDESPSVKRRM-DTWT 498
DanR\_MEF2A -----GRPDMGRSPVDSLSSSSS-SYDGSREDHRPDFHSPVILGRPPAADERESP SVKRRM-DTWT 455
GalG\_MEF2A PQQPQPQPQROEMGRSPVDSLSSSSS-SYDGSREDPRSDFHSPVILGRPPNTEDESPSVKRRM-DTWT 498
RatN\_MEF2A PQQPQPQPQROEMGRSPVDSLSSSSS-SYDGSREDPRGDFHSPVILGRPPNTEDESPSVKRRM-DTWT 492
BosT\_MEF2A PPFQAPQPQROEMGRSPVDSLSSSSS-SYDGSREDPRGDFHSPVILGRPPNTEDESPSVKRRM-DAWVT 489
MonD\_MEF2A QQQQQQQQROEMGRSPVDSLSSSSS-SYDGSREDPRSDFHSPVILGRPPNTEDESPSVKRRM-DTWT 502
XenL\_MEF2A -----PRPEM-----DLSLSSSSS-SYDGSREDVRNDFHSPVILGRPPANNEDRSPSVKRRM-DAWVT 473
OrnA\_MEF2A QQQPQQQSSRQEIQRSPVDSLSSSSS-SYDGSREDPRSDFHSPVILGRPPNTEDESPSVKRRM-DTWT 505
TaeG\_MEF2A -----PPPSRQELGRSPVDSLSSSSS-SYDGSREDPRSDFHSPVILGRPPNTEDESPSVKRRM-DTWT 493
OryC\_MEF2A PQQPQPQPQROEMGRSPVDSLSSSSS-SYDGSREDPRGDFHSPVILGRPPNTEDESPSVKRRM-DAWVT 497
CanF\_MEF2C -----YPOHTRHEAGRSPVDSLSSCSS-SYDGSREDHRNEFHSPVILGRPPNTEDESPSVKRRM-DTWT 473
MacM\_MEF2C -----YPOHTRHEAGRSPVDSLSSCSS-SYDGSREDHRNEFHSPVILGRPPNTEDESPSVKRRM-DTWT 473
PanT\_MEF2C -----YPOHTRHEAGRSPVDSLSSCSS-SYDGSREDHRNEFHSPVILGRPPNTEDESPSVKRRM-DTWT 471
SusS\_MEF2C -----YPOHTRHEAGRSPVDSLSSCSS-SYDGSREDHRNEFHSPVILGRPPNTEDESPSVKRRM-DTWT 433
EquC\_MEF2C -----YPOHTRHEAGRSPVDSLSSCSS-SYDGSREDHRNEFHSPVILGRPPNTEDESPSVKRRM-DTWT 473
PonA\_MEF2C -----YPOHTRHEAGRSPVDSLSSCSS-SYDGSREDHRNEFHSPVILGRPPNTEDESPSVKRRM-DTWT 473
HomS\_MEF2C -----YPOHTRHEAGRSPVDSLSSCSS-SYDGSREDHRNEFHSPVILGRPPNTEDESPSVKRRM-DTWT 471
CalJ\_MEF2C -----YPOHTRHEAGRSPVDSLSSCSS-SYDGSREDHRNEFHSPVILGRPPNTEDESPSVKRRM-DTWT 473
AilM\_MEF2C -----YPOHTRHEAGRSPVDSLSSCSS-SYDGSREDHRNEFHSPVILGRPPNTEDESPSVKRRM-DTWT 473
MusM\_MEF2C -----YPOHTRHEAGRSPVDSLSSCSS-SYDGSREDHRNEFHSPVILGRPPNTEDESPSVKRRM-DTWT 465
GalG\_MEF2C ----- 367
RatN\_MEF2C -----YPOHTRHEAGRSPVDSLSSCSS-SYDGSREDHRNEFHSPVILGRPPNTEDESPSVKRRM-DTWT 465
BosT\_MEF2C -----YPOHTRHEAGRSPVDSLSSCSS-SYDGSREDHRNEFHSPVILGRPPNTEDESPSVKRRM-DTWT 441
XenT\_MEF2C -----YPOHTRHEAGRSPVDSLSSCSS-SYDGSREDHRNEFHSPVILGRPPNTEDESPSVKRRM-DTWT 432
MonD\_MEF2C -----YPOHTRHEAGRSPVDSLSSCSS-SYDGSREDHRNEFHSPVILGRPPNTEDESPSVKRRM-DTWT 473
XenL\_MEF2C -----YPHHTRHDAGRSPVDSLSSCSS-SYDGSREDHRNDFHSPVILGRPPNTEDESPSVKRRM-DTWT 429
OrnA\_MEF2C -----YPOHTRHEAGRSPVDSLSSCSS-SYDGSREDHRNEFHSPVILGRPPNTEDESPSVKRRM-DTWT 473
TaeG\_MEF2C -----YQOHTHEAGRSPVDSLSSCSS-SYDGSREDHRNEFHSPVILGRPPNTEDESPSVKRRM-DTWT 473
OviA\_MEF2C -----YPOHTRHEAGRSPVDSLSSCSS-SYDGSREDHRNEFHSPVILGRPPNTEDESPSVKRRM-DTWT 433
OryC\_MEF2C -----YPPHTRHEAGRSPVDSLSSCSS-SYDGSREDHRNEFHSPVILGRPPNTEDESPSVKRRM-DTWT 465
DanR\_MEF2Ca -----YQQTRQDSGRSPVDSLSSCGS-SYDGSREDHRANFHSPVILGRPPNTEDESPSVKRRM-DTWT 459
DanR\_MEF2Cb -----YPSHQQRQDSGRSPVDSLSSCGS-SHEGSDREHRPDFHSPVILGRPPGLD-DQDPSIKRRLSEGWAT 451
CanF\_MEF2D -----PPPAVFPAARPEPGDGLSSPAGSSYETGDRDDGRGDFGPTLGLLRPAPEPEAEGSAVKRM-RLDTWDL 440
MacM\_MEF2D -----PPPAVFPAARPEPGDGLSSPAGSSYETGDRDDGRGDFGPTLGLLRPAPEPEAEGSAVKRM-RLDTWDL 520
PanT\_MEF2D -----PPPAVFPAARPEPGDGLSSPAGSSYETGDRDDGRGDFGPTLGLLRPAPEPEAEGSAVKRM-RLDTWDL 520
SusS\_MEF2D -----PTRSLFQAARIQPCAGLSTPAQASAAAARLHGRGKAGRTLGLQGPEDPAAVGPQDRTV-GATFHFL 516
EquC\_MEF2D -----PPPAVFPAARPEPGDGLSSPAGSSYETGDRDDGRGDFGPTLGLLRPAPEPEAEGSAVKRM-RLDTWGL 462
PonA\_MEF2D -----PPPAVFPAARPEPGDGLSSPAGSSYETGDRDDGRGDFGPTLGLLRPAPEPEAEGSAVKRM-RLDTWVL 520
HomS\_MEF2D -----PPPAVFPAARPEPGDGLSSPAGSSYETGDRDDGRGDFGPTLGLLRPAPEPEAEGSAVKRM-RLDTWVL 520
CalJ\_MEF2D -----PPPAVFPAARPEPGDGLSSPAGSSYETGDRDDGRGDFGPTLGLLRPAPEPEAEGSAVKRM-RLDTWVL 416
AilM\_MEF2D -----PPPAVFPAARPEPGDGLSSPAGSSYETGDRDDGRGDFGPTLGLLRPAPEPEAEGSAVKRM-RLDTWVL 476
MusM\_MEF2D -----PPPAVFPAARPEPGDGLSSPAGSSYETGDRDDGRGDFGPTLGLLRPAPEPEAEGSAVKRM-RLDTWVL 506
DanR\_MEF2D -----TPTVSQVPTLRLLEPGRSITSNSSSYEGSDRDDSQQPDFSSLGLLRATGQQQESANVKRM-RLDTWVT 501
GalG\_MEF2D ----- 352
RatN\_MEF2D -----PPPAVFPAARPEPGDGLSSPAGSSYETGDRDDGRGDFGPTLGLLRPAPEPEAEGSAVKRM-RLDTWVL 506
BosT\_MEF2D -----PPPAVFPAARPEPGDALSSPAGSSYETGDRDDGRGDFGPTLGLLRPAPEPEAEGSAVKRM-RLDTWVL 513
XenT\_MEF2D -----GTPLSSTPQSRHEVGRSLSNASSFEGNDRREDPRGDTSSSLGLLRPSGDTSESESQSVKRM-RLDAWVT 489
MonD\_MEF2D -----PAPAFPPARPEPGDGLSSPAGSSYETGDRDDGRGDFGPTLGLLRPAPEPEAEGSAVKRM-RLDTWVT 522
TaeG\_MEF2D -----PLSTFPHQPRHEPGRSLSNASSYEGNDRREDPRGDTSSSLGLLRPSGDTSESESQSVKRM-RLDTWVT 440
OryC\_MEF2D -----PPPAVFPAARPEPDDSLSSPAGGAYETGDRDDGRGDFGPTLGLLRPAPEPEAEGSAVKRM-RLDTWVL 509
XenL\_MEF2Db -----GTPLSSTPQSRHEVGRSLSNASSFEGNDRREDPRGDTSSSLGLLRPSGDTSESESQSVKRM-RLDAWVT 489
XenL\_MEF2Da -----GTPLSSTPQSRHEVGRSLSNASSFEGNDRREDPRGDTSSSLGLLRPSGDTSESESQSVKRM-RLDAWVT 490
CanF\_MEF2B -----SPAPGGPDPFKTFYPYLLLARS LAEPLRPGPALRRLLPLADGWPR 337
MacM\_MEF2B -----SPAPGGPDPFKTFYPYLLLARS LAEPLRPGPALRRLLPLADGWPR 368
PanT\_MEF2B -----SPAPGGPDPFKTFYPYLLLARS LAEPLRPGPALRRLLPLADGWPR 368
EquC\_MEF2B -----SPAPGGPDPFKTFYPYLLLARS LAEPLRPGPALRRLLPLADGWPR 305
PonA\_MEF2B -----SPAPGGPDPFKTFYPYLLLARS LAEPLRPGPALRRLLPLADGWPR 368
HomS\_MEF2B -----SPAPGGPDPFKTFYPYLLLARS LAEPLRPGPALRRLLPLADGWPR 368
CalJ\_MEF2B -----SPAPGGPDPFKTFYPYLLLARS LAEPLRPGPALRRLLPLADGWPR 368
AilM\_MEF2B -----SPAPGGPDPFKTFYPYLLLARS LAEPLRPGPALRRLLPLADGWPR 365
MusM\_MEF2B -----SPVVTGSDGDFRSPFPYLLLARS LAEPLRPGPALRRLLPLADGWPR 348
RatN\_MEF2B -----SPVVTGSDGDFRSPFPYLLLARS LAEPLRPGPALRRLLPLADGWPR 347
BosT\_MEF2B -----SPAPGGPDPFKTFYPYLLLARS LAEPLRPGPALRRLLPLADGWPR 368
MonD\_MEF2B -----SPGAVPRDDFTKSYQYVGLARP-----GQPLRRLLHVADSWPR 361
OrnA\_MEF2B -----SPGATCRDFTKGYVYPLVLARLNEEPTGLPTRRLLQVAEMVVV 366
DroMel\_MEF2 -----DKNEGYPYRALMGHNRWNFAGAPSSDQVRLAAVAQQQQQQHQQQQLGDYDAPNHKRRPRISGGWG 530
DroSim\_MEF2 -----DKNEGYPYRALMGHNRWNFAGAPSSDQVRLAAVAQQQQQQHQQQQLGDYDAPNHKRRPRISGGWG 530
DroAna\_MEF2 -----DKNDGYPYRALMGHNRWNFAGAPSSDQVRLAAVAQQQQQQHQQQQLGDYDAPNHKRRPRISGGWG 534
DroEre\_MEF2 -----DKNEGYPYRALMGHNRWNFAGAPSSDQVRLAAVAQQQQQQHQQQQLGDYDAPNHKRRPRISGGWG 533
DroGri\_MEF2 -----DKNEGYPYRALMGHNRWNFAGAPSSDQVRLAAVAQQQQHQQQQLGDYDAPNHKRRPRISGGWG 515
DroMoj\_MEF2 -----DKNEGYPYRALMGHNRWNFAGAPSSDQVRLAAVAQQQQQQHQQQQLGDYDAPNHKRRPRISGGWG 518
DroPer\_MEF2 -----DKNEGYPYRALMGHNRWNFAGAPSSDQVRLAAVAQQQQQQHQQQQLGDYDAPNHKRRPRISGGWG 528
DroSec\_MEF2 -----DKNEGYPYRALMGHNRWNFAGAPSSDQVRLAAVAQQQQQQHQQQQLGDYDAPNHKRRPRISGGWG 530
DroVir\_MEF2 -----DKNEGYPYRALMGHNRWNFAGAPSSDQVRLAAVAQQQQQQHQQQQLGDYDAPNHKRRPRISGGWG 513
DroWil\_MEF2 -----DKNEGYPYRALMGHNRWNFAGAPSSDQVRLAAVAQQQQQQHQQQQLGDYDAPNHKRRPRISGGWG 528
DroYak\_MEF2 -----DKNEGYPYRALMGHNRWNFAGAPSSDQVRLAAVAQQQQQQHQQQQLGDYDAPNHKRRPRISGGWG 532
DroPse\_MEF2 -----DKNEGYPYRALMGHNRWNFAGAPSSDQVRLAAVA-QHQQQQQQQQLGDYDAPNHKRRPRISGGWG 527
AnoG\_MEF2 -----HSRPSSTGHLTPPDSYMPIGGHLGASVPTNAPSVDIRHLSTGGSHLPEYDAPTHKRRPRISSEGWA 496
CulQ\_MEF2d -----NHSHLHSRPSSTGHLTPPDSYMPIGGHLGASVPTNAPSVDIRHLSTGGSHLPEYDAPTHKRRPRISSEGWA 486
AedA\_MEF2d -----ALGSSLLNHSRLHSRPSSTGHLTPPDSYMPIGGHLGASVPTNAPSVDIRHLSTGGSHLPEYDAPTHKRRPRISSEGWA 473
TriC\_MEF2 -----SAGHITFPDGSVPTNLPSTGPPSGGDYENIQHRRARLSDWF 413
ApiM\_MEF2 -----RPSNPPSHSGSITPNTLSPGSAVADIRSHSNIGGNGGNSDYENQPMKRRSRITEGWA 461
BomM\_MEF2 -----VIDGSVSSNMCGPAGQDMRHSNAVALDYEQHTKRRP-RIEGWA 398
CioI\_MEF2 -----KDPDQRPAAGRSPMEVMFPYEMRMDRSMVENGGNLPVKRQRVESGPN-----ASPWT 428
BraF\_MEF2 -----NNQGGHLHANTSPVNSLSSSSSFPFADGDRDGSFSPGSSRMRKAMEDGGRMRLSL----- 435
CaeB\_MEF2 -----SLNGHSLVLDLGGPIPPYKMDPNAYIKVEPHSPQKRRPRITTEWRQ 340
CaeE\_MEF2 -----SLNGHSLVLDLGGPIPPYKMDPNAYIKVEPHSPQKRRPRITTEWRQ 337
CaeR\_MEF2 -----SLNGHSLVLDLGGPIPPYKMDPNAYIKVEPHSPQKRRPRITTEWRQ 338
NasV\_MEF2d -----SNPPSHSGSITPNTLSPGPGQGGGGGNGVVGDRTSHGPGASGSSGDYENQPMKRRSRITEGWA 445
SacK\_MEF2 -----TPHDAMSPGRHSCHSASASPFAGSDREDRGGGSDSNQSSGNGRSIMGDKDGPPTKRORIENTAWS 468
GalG\_MEF2 -----NI-SAWQQQQQQQQQQQQQQQQQQQQQQQQQQQQQQQQQQQQ 376
PhyI\_MEF2 -----SPEASGDKPSEDEVCKVEKPEKEQSRQDDSNNEQDSAKENETDKAKSLSFKRE----- 368
SchM\_MEF2a -----IHESIAALNSCKTQQPQQQLQNPNNILDDITGVGSIPTSNQRSFKPDQFTESVPSPELLFLSSNNMNSNKL 573
.....510.....520.....530.....540.....550.....560.....570....

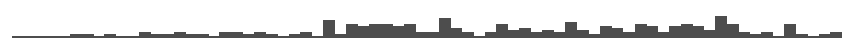

Supplement: pone.0017334.s002.pdf [file pone.0017334.s002.pdf]
