# Supplementary material for: Vertebrate Paralogous MEF2 Genes: Origin, Conservation, and Evolution
Source: PubMed Central journal article supplement (PMC3048864; doi:10.1371/journal.pone.0017334), 2011-03-04

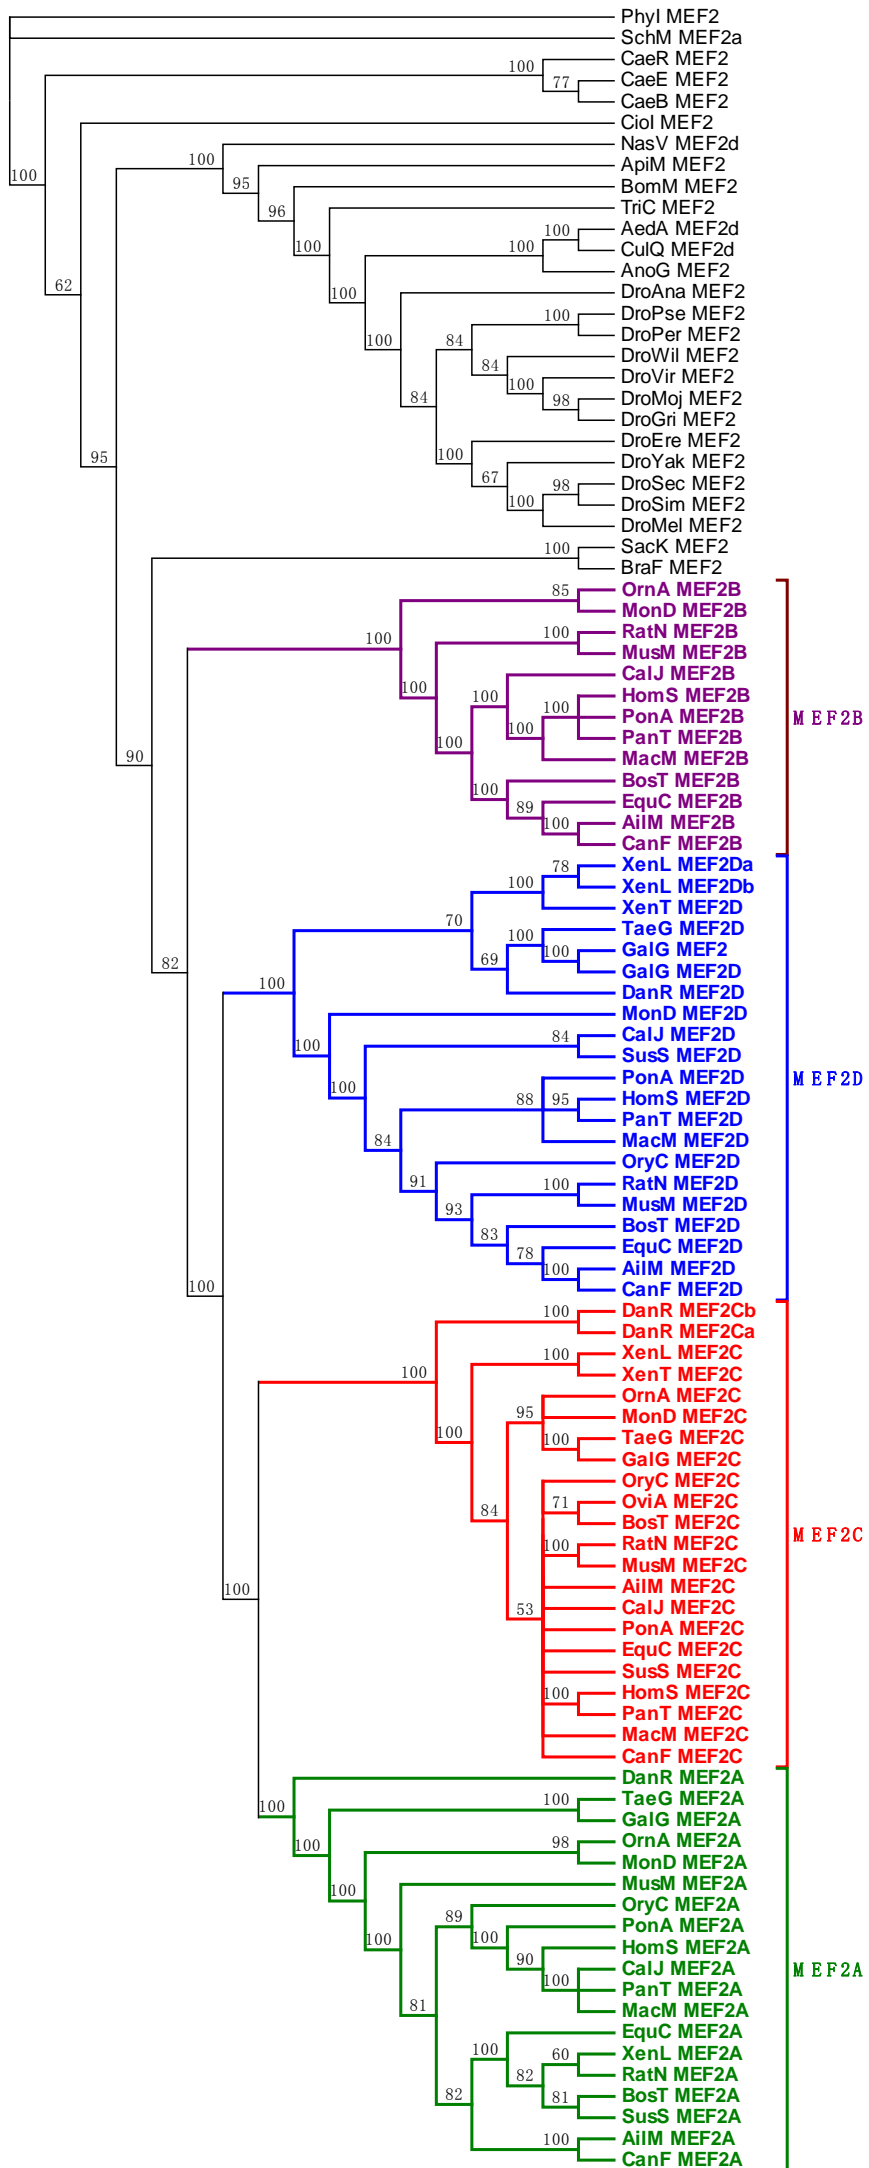

Supplement: pone.0017334.s005.pdf [file pone.0017334.s005.pdf]
